# Supplementary material for: Hydrogen-bonded organic framework-derived, flower-on-fiber-like, carbon nanofiber electrodes for supercapacitors
Source: Royal Society of Chemistry journal article supplement (doi:10.1039/d3ta06722j), 2024-01-01
Supplement: d3ta06722j1.pdf [file d3ta06722j1.pdf]

Supporting information

**Hydrogen-bonded organic framework-derived, flower-on-fiber-like, carbon nanofiber electrode for supercapacitors**

Woo Jin Mun, Bomi Kim, Seung Jae Moon and Jong Hak Kim\*

*Department of Chemical and Biomolecular Engineering, Yonsei University, 50 Yonsei-ro,  
Seodaemun-gu, Seoul 03722, South Korea*

\* To whom correspondence should be addressed

Tel: +82-2-2123-5757; Fax: +82-2-312-6401

E-mail: [jonghak@yonsei.ac.kr](mailto:jonghak@yonsei.ac.kr)

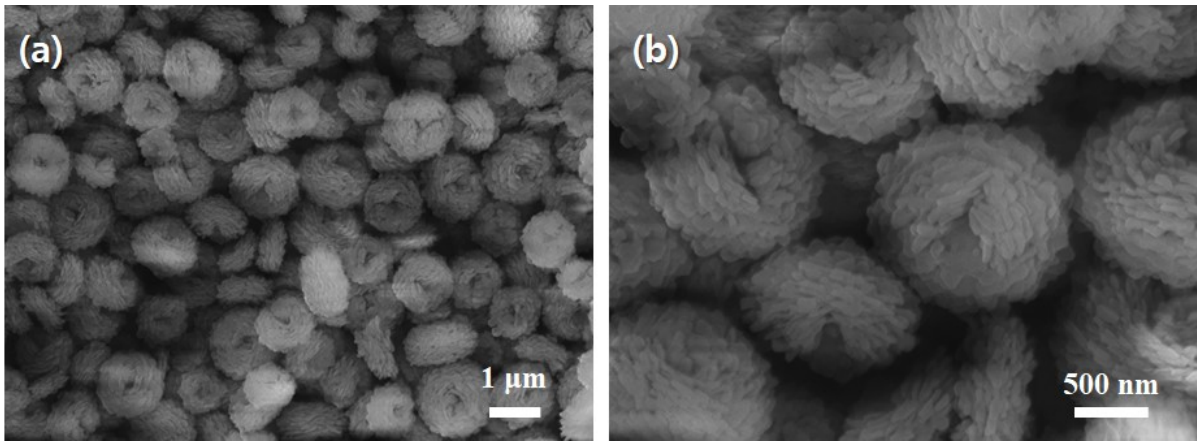

**Fig. S1.** (a, b) SEM images of MCA.

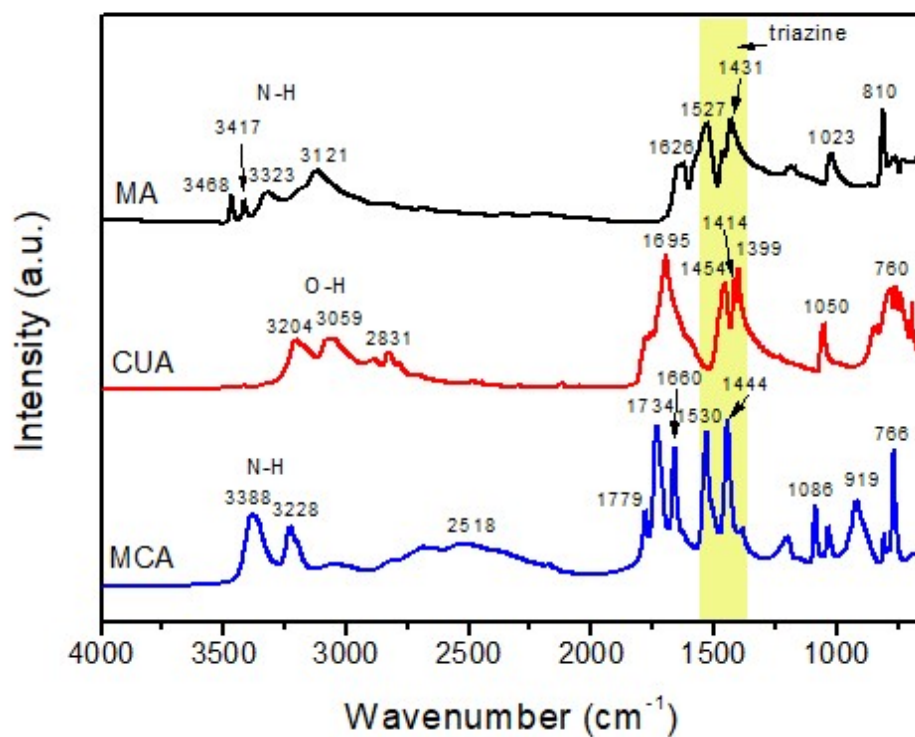

Fig. S2. FT-IR spectra of MA, CUA, and MCA.

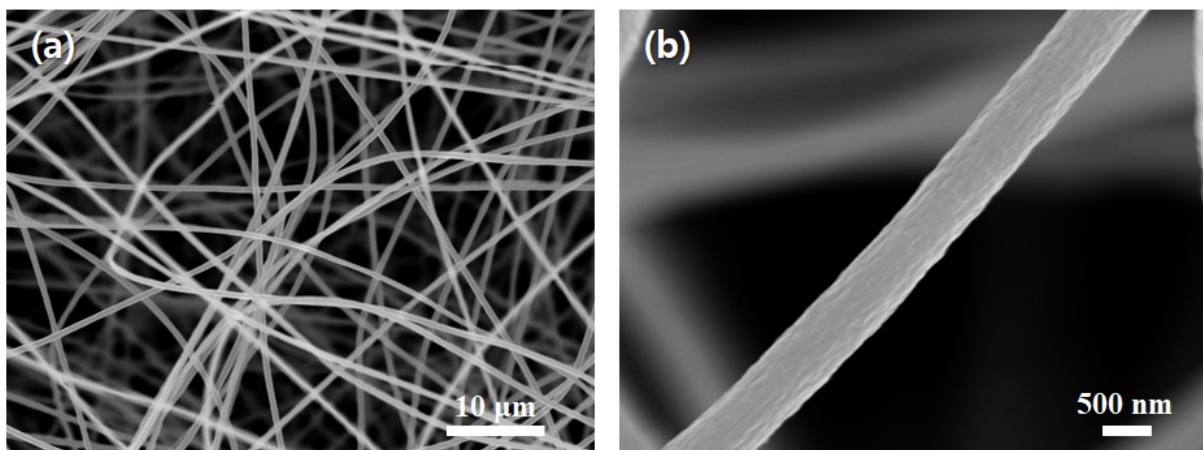

**Fig S3.** (a, b) SEM images of PAN nanofibers.

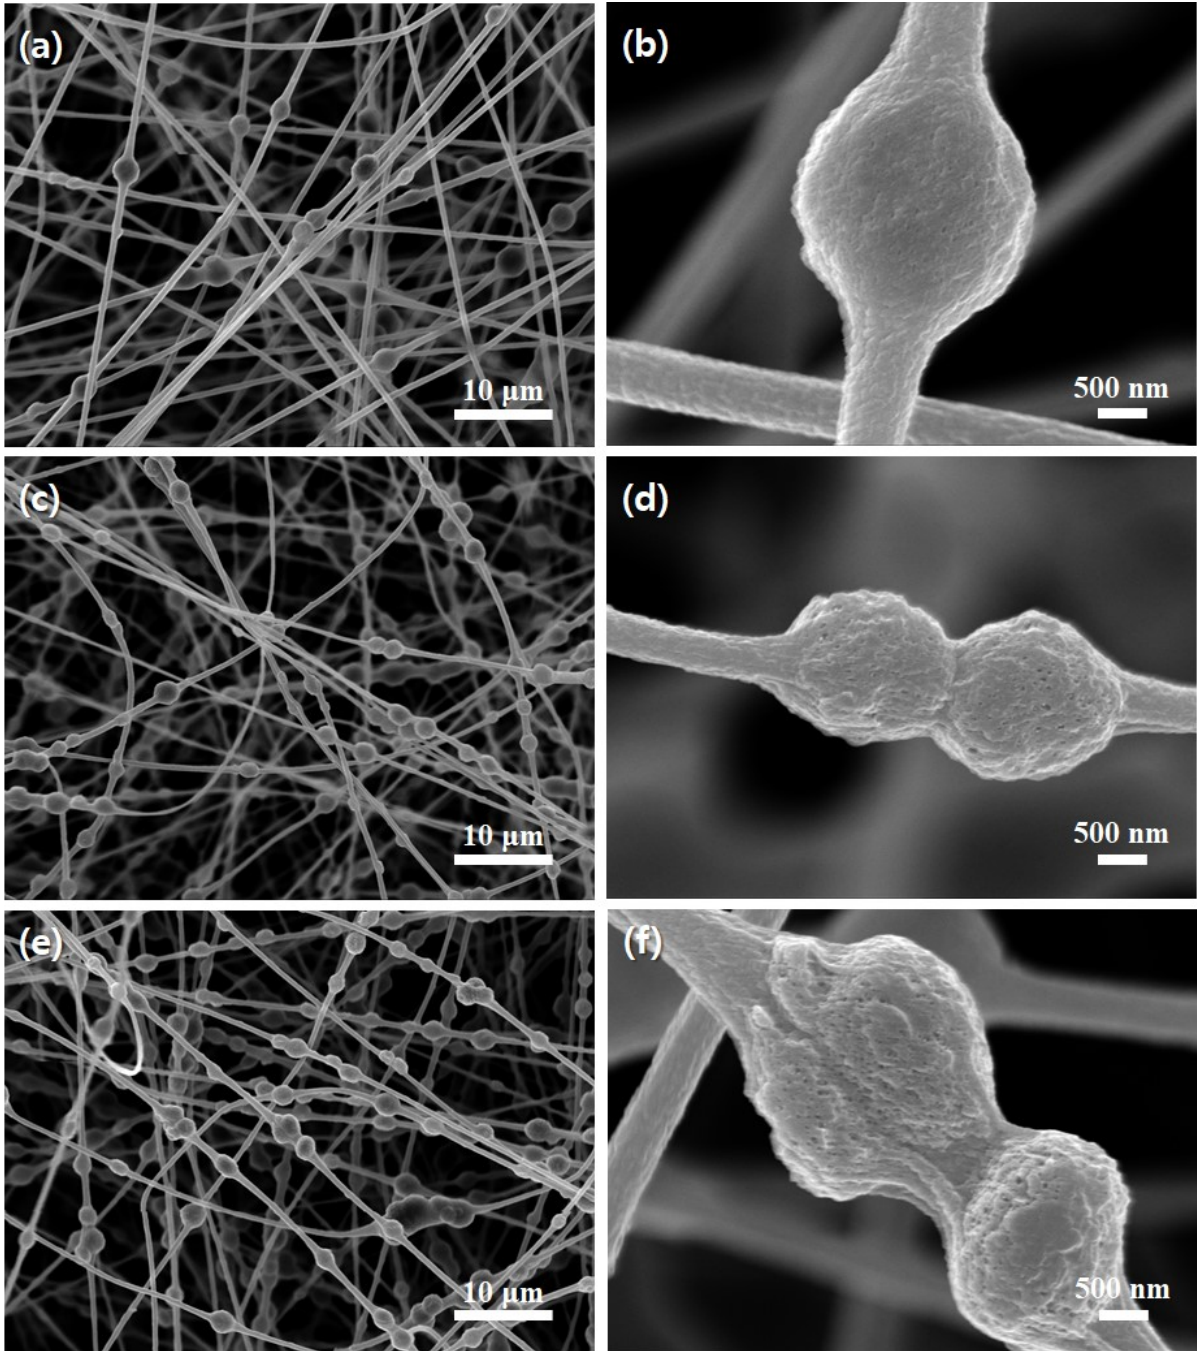

**Fig. S4.** SEM images of (a, b) PAN@MCA<sub>0.125</sub>, (c, d) PAN@MCA<sub>0.375</sub>, and (e, f) PAN@MCA<sub>0.5</sub> nanofibers.

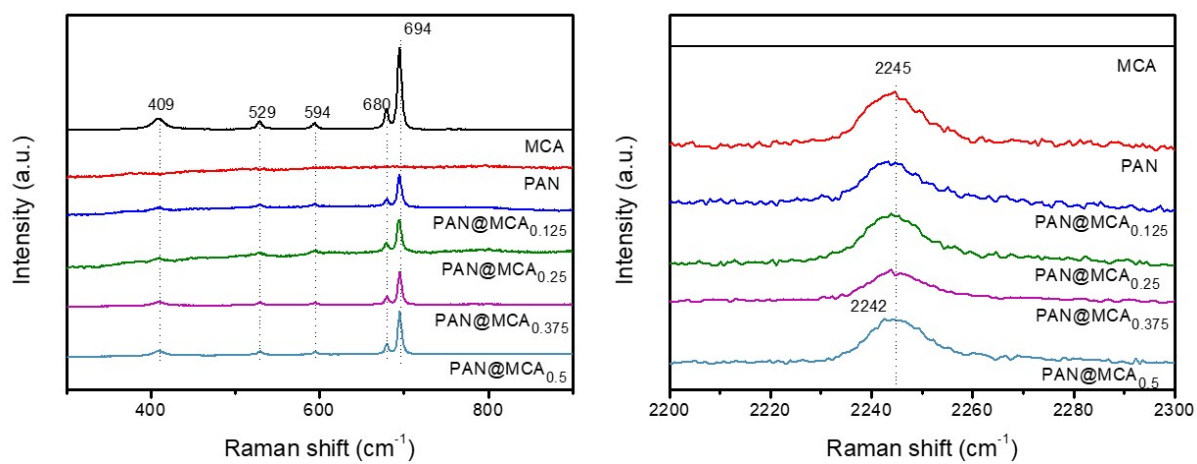

**Fig. S5.** (a, b) Raman spectra of MCA, PAN, and PAN@MCA nanofibers.

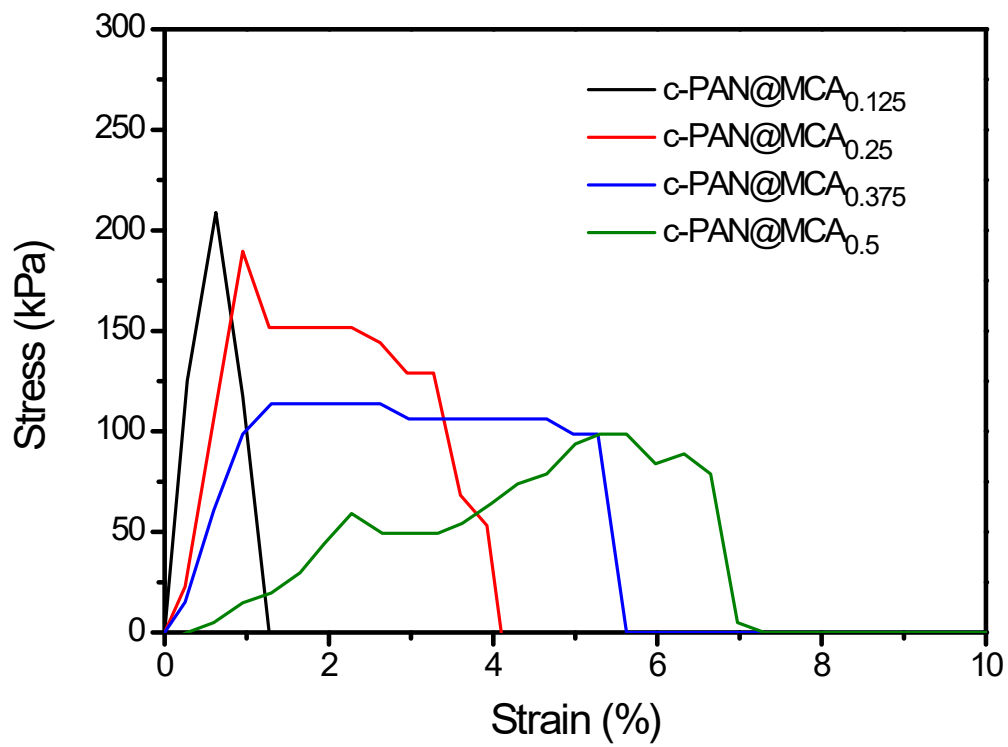

**Fig. S6.** Stress-strain curves of c-PAN@MCA nanofibers.

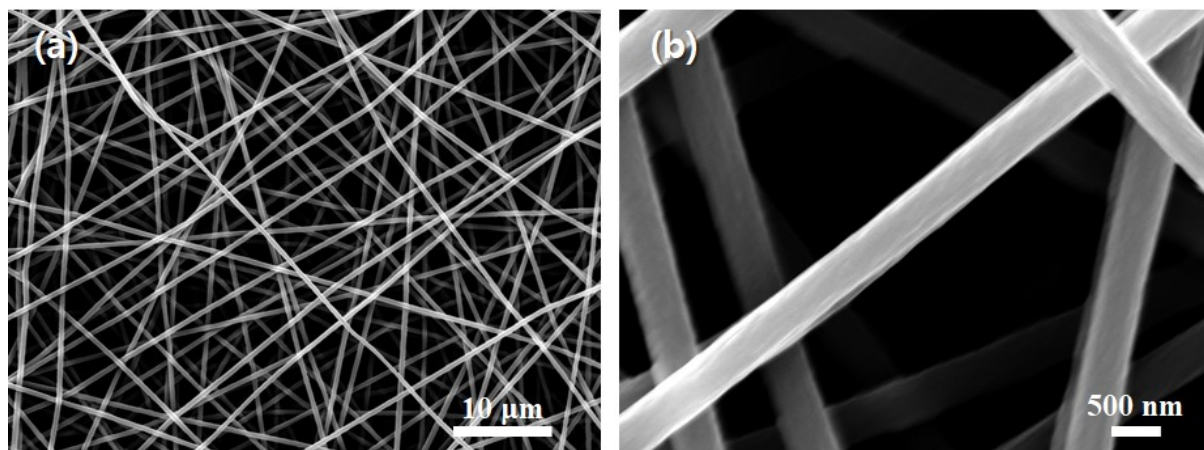

**Fig. S7.** (a, b) SEM images of c-PAN nanofibers.



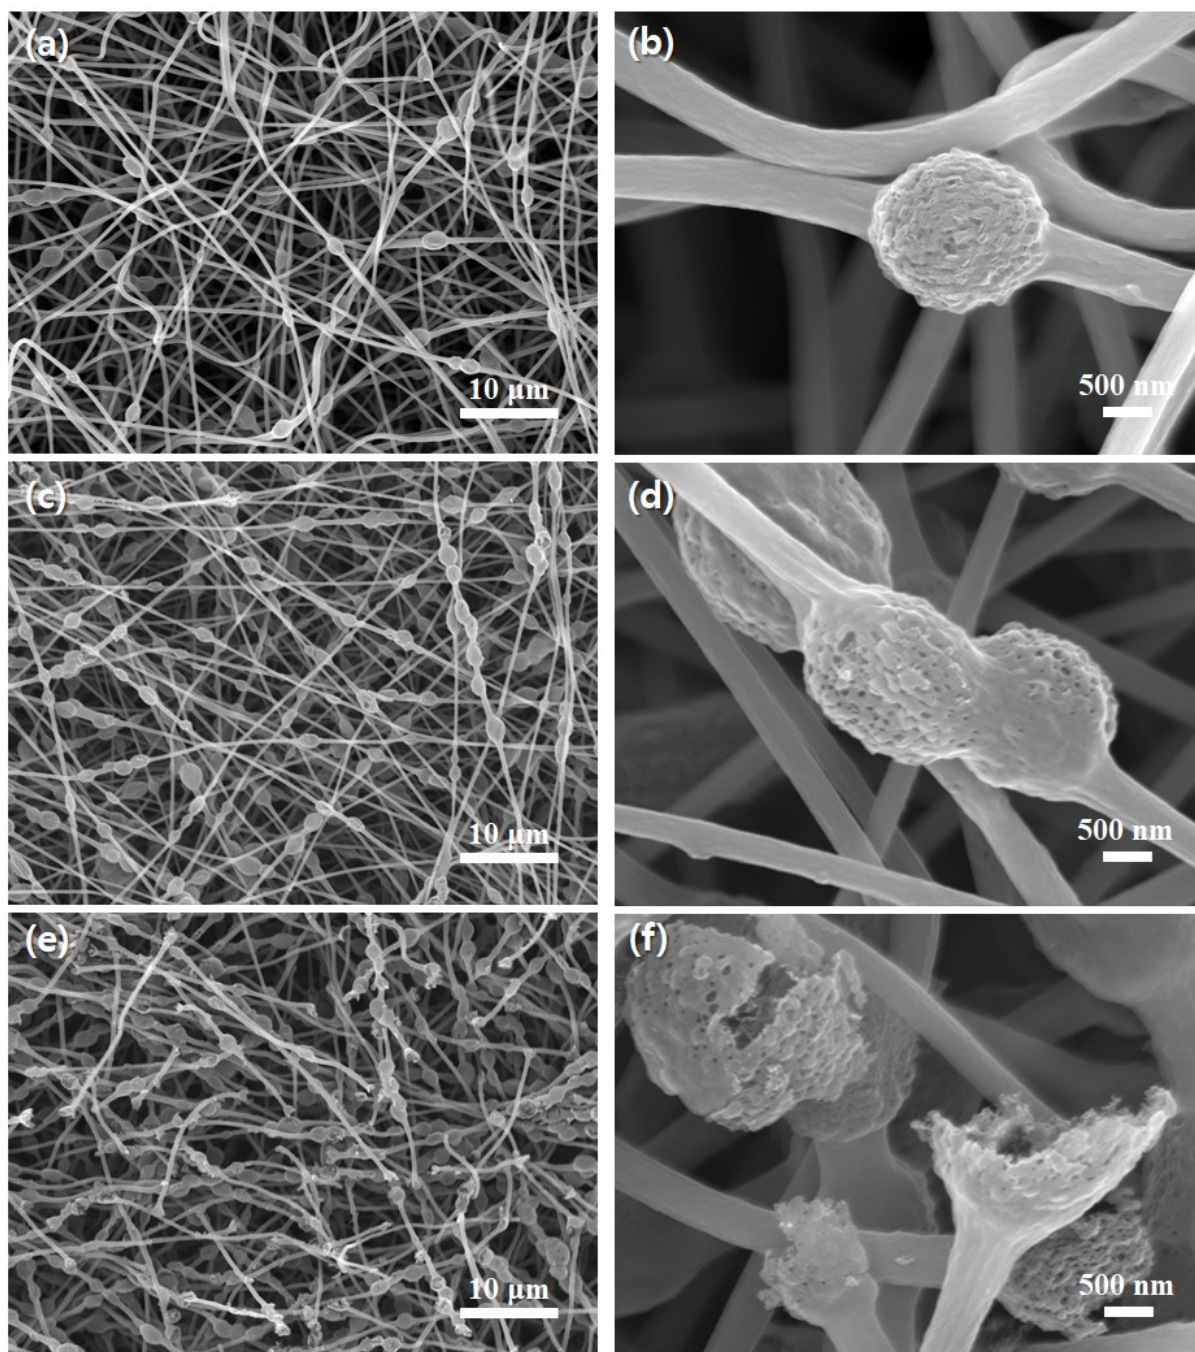

**Fig. S8.** SEM images of (a, b) c-PAN@MCA<sub>0.125</sub>, (c, d) c-PAN@MCA<sub>0.375</sub>, and (e, f) c-PAN@MCA<sub>0.5</sub> nanofibers.

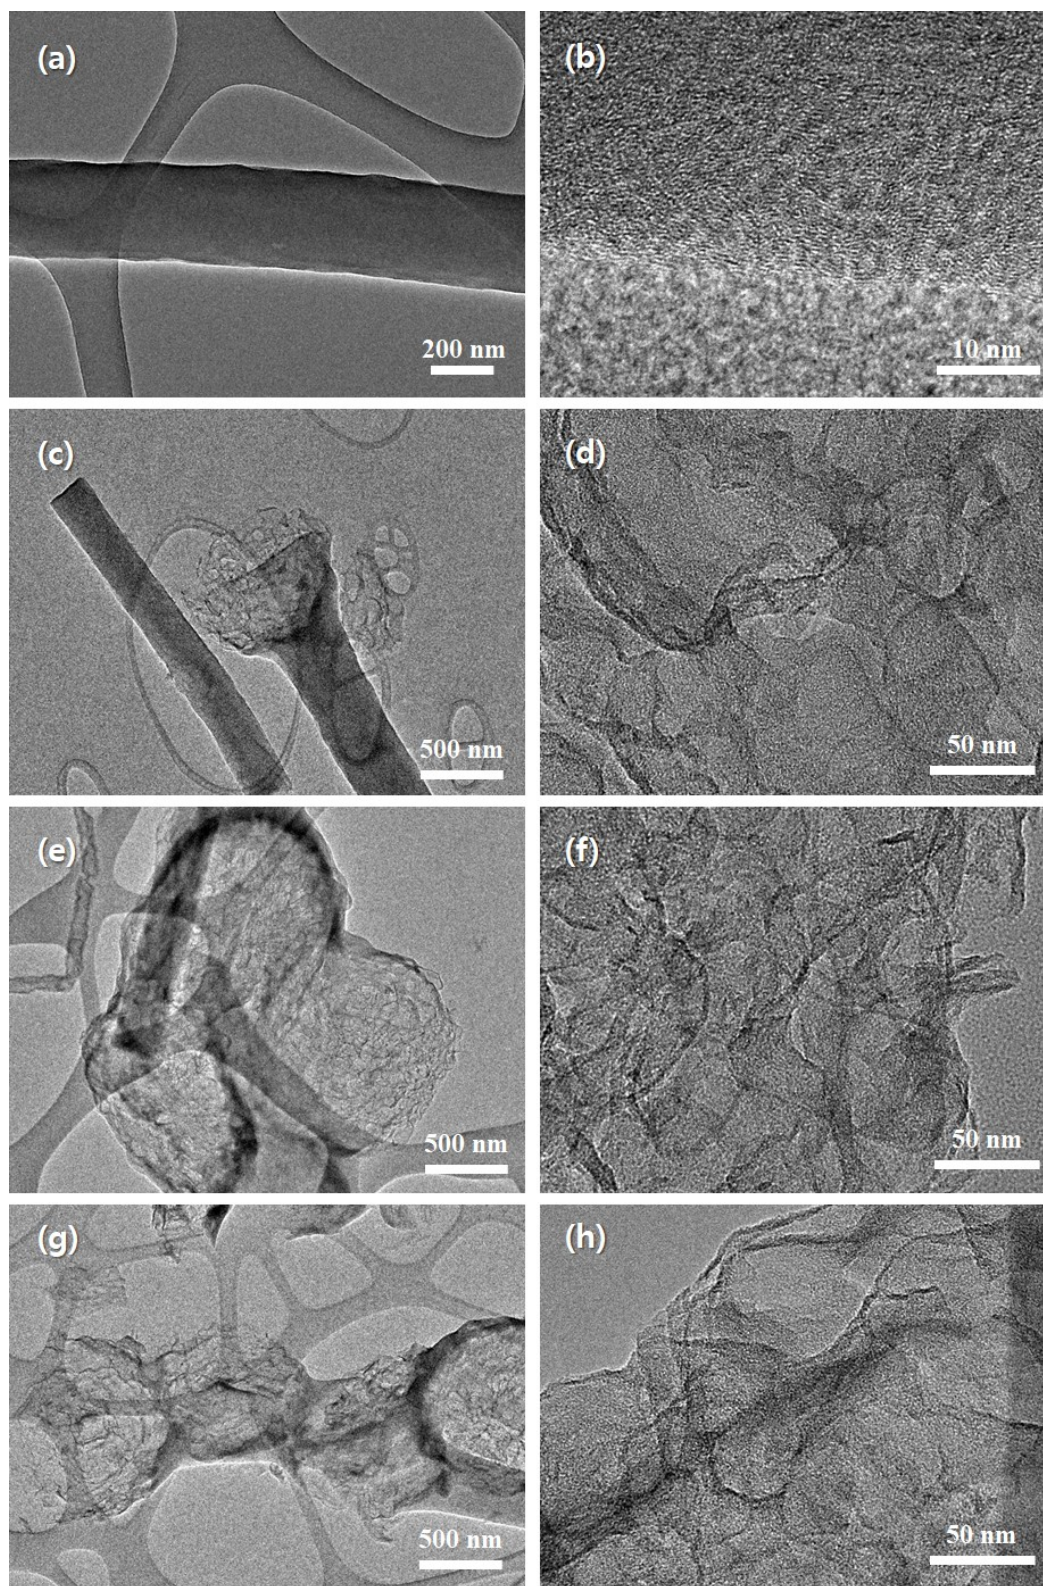

**Fig. S9.** TEM images of (a, b) c-PAN, (c, d) c-PAN@MCA<sub>0.125</sub>, (e, f) c-PAN@MCA<sub>0.375</sub>, and (g, h) c-PAN@MCA<sub>0.5</sub> nanofibers.

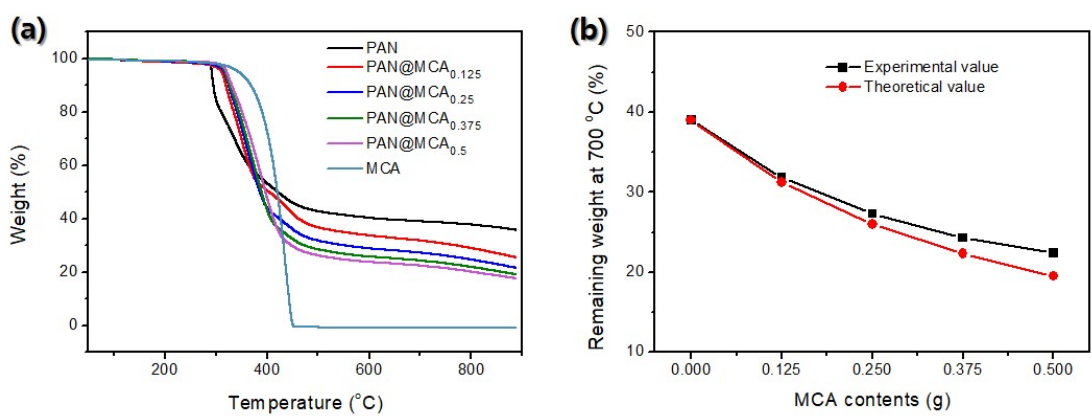

**Fig. S10.** (a) TGA curves of PAN, PAN@MCA nanofibers, and MCA. (b) Experimental and theoretical remaining weight at 700 °C with various MCA contents.

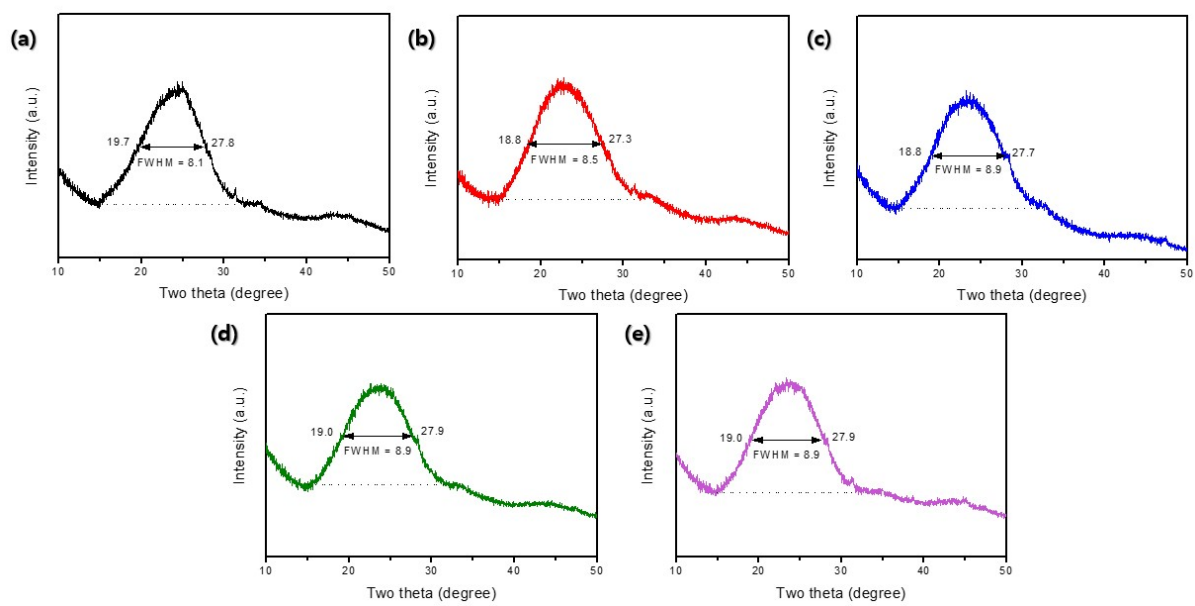

**Fig. S11.** XRD patterns at low angle and FWHM values of (a) c-PAN, (b) c-PAN@MCA<sub>0.125</sub>, (c) c-PAN@MCA<sub>0.25</sub>, (d) c-PAN@MCA<sub>0.375</sub>, and (e) c-PAN@MCA<sub>0.5</sub>.

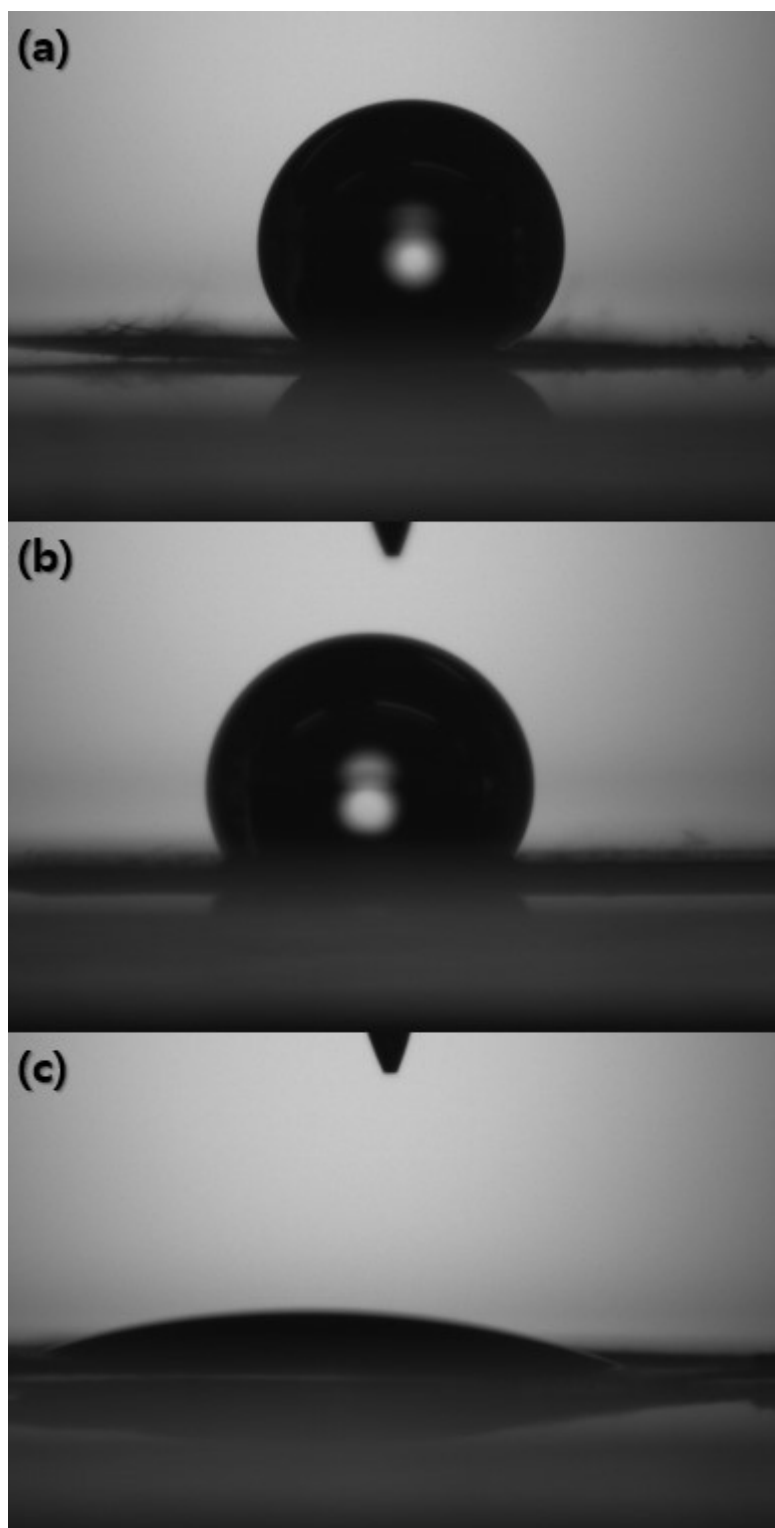

**Fig. S12.** Contact angle measurements for (a) c-PAN, (b) c-PAN@MCA<sub>0.125</sub>, and (c) c-PAN@MCA<sub>0.25</sub>.

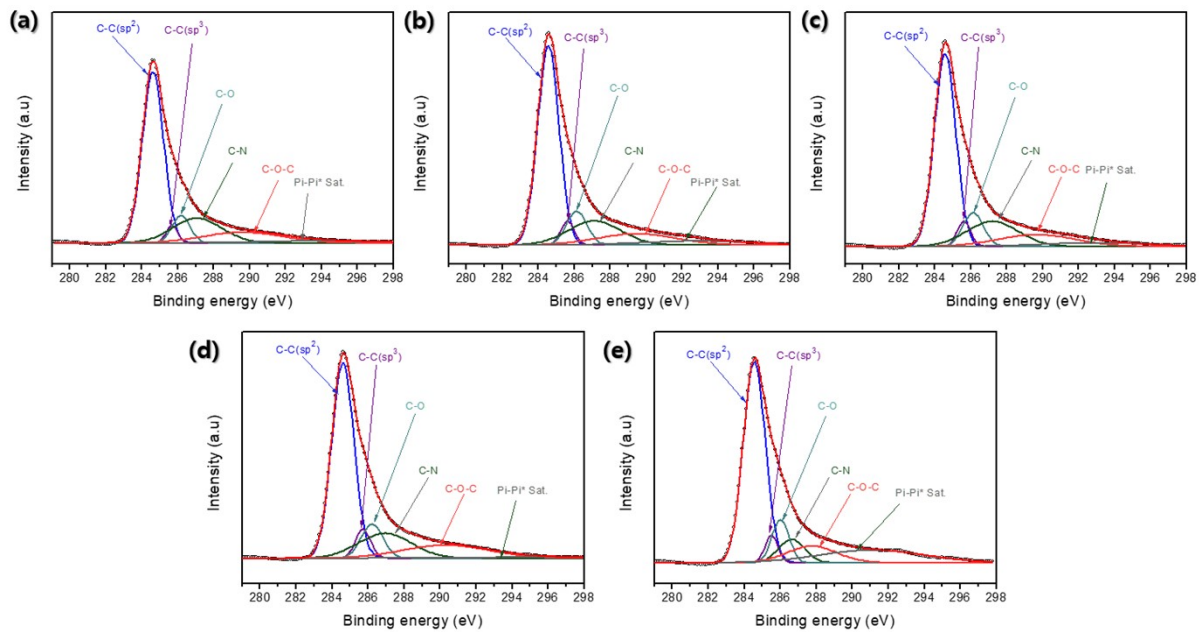

**Fig. S13.** Enlarged views of high-resolution XPS C1s spectra of (a) c-PAN, (b) c-PAN@MCA<sub>0.125</sub>, (c) c-PAN@MCA<sub>0.25</sub>, (d) c-PAN@MCA<sub>0.375</sub>, and (e) c-PAN@MCA<sub>0.5</sub>.

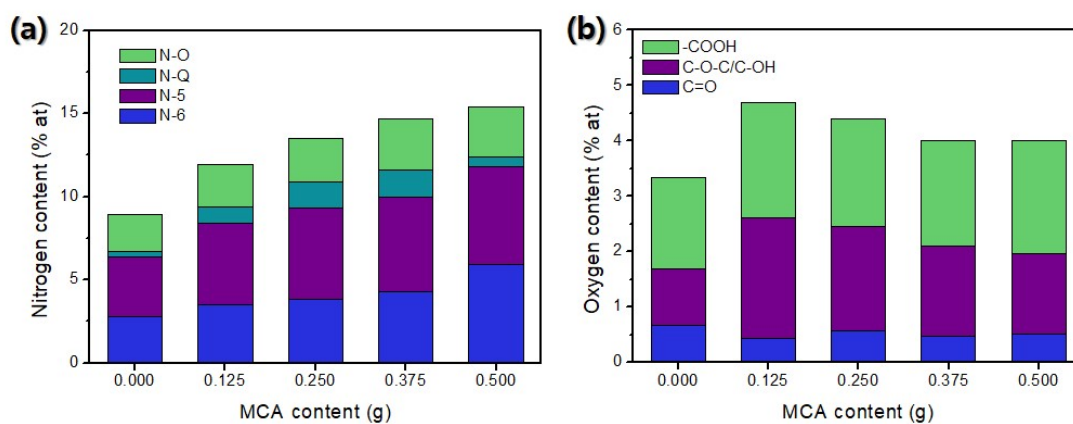

**Fig. S14.** (a) Nitrogen contents of c-PAN and c-PAN@MCA nanofibers from high-resolution XPS N1s spectra. (b) Oxygen contents of c-PAN and c-PAN@MCA nanofibers from high-resolution XPS O1s spectra.

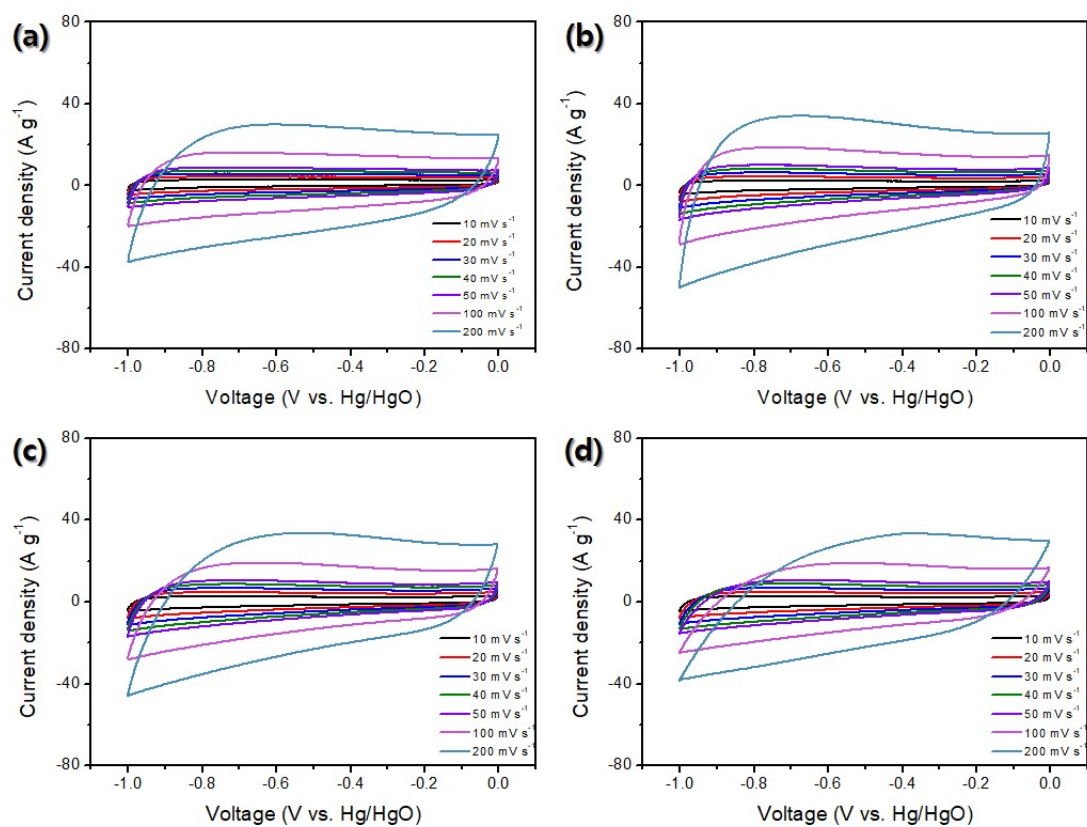

**Fig. S15.** CV curves of (a) c-PAN, (b) c-PAN@MCA<sub>0.125</sub>, (c) c-PAN@MCA<sub>0.375</sub>, and (d) c-PAN@MCA<sub>0.5</sub> at various scan rates.



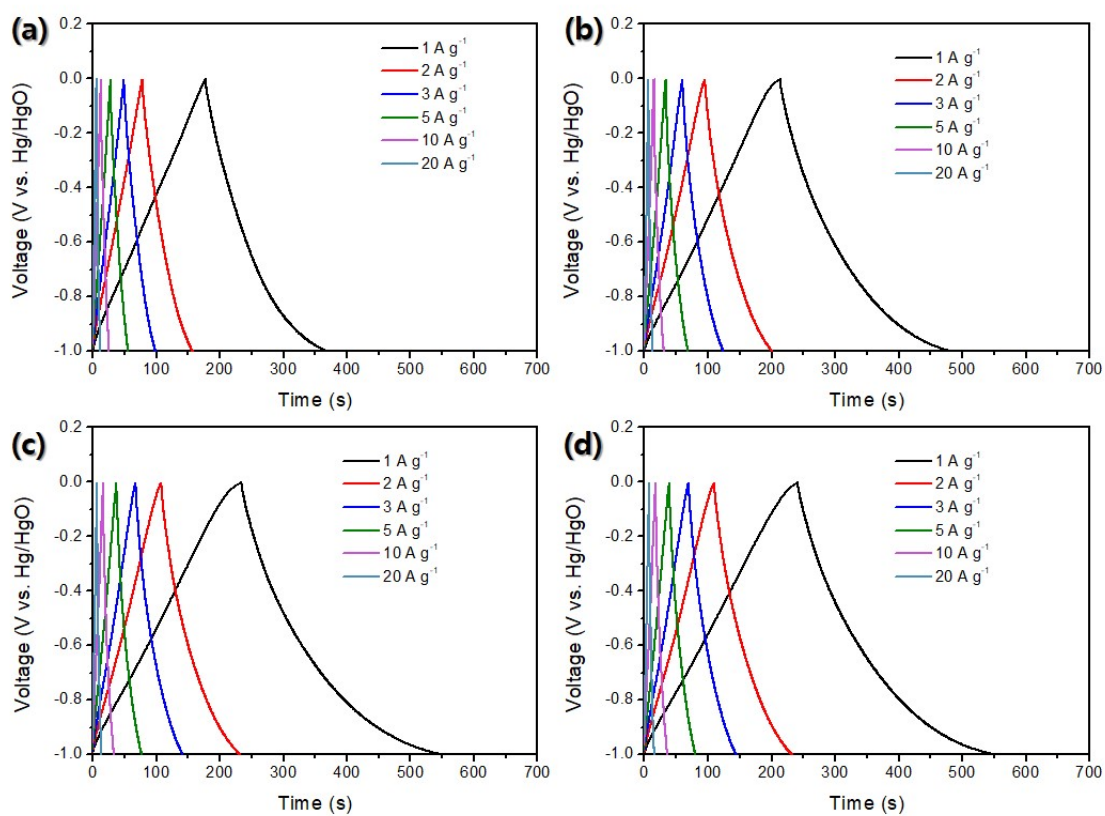

**Fig. S16.** GCD curves of (a) c-PAN, (b) c-PAN@MCA<sub>0.125</sub>, (c) c-PAN@MCA<sub>0.375</sub>, and (d) c-PAN@MCA<sub>0.5</sub> at various current densities.

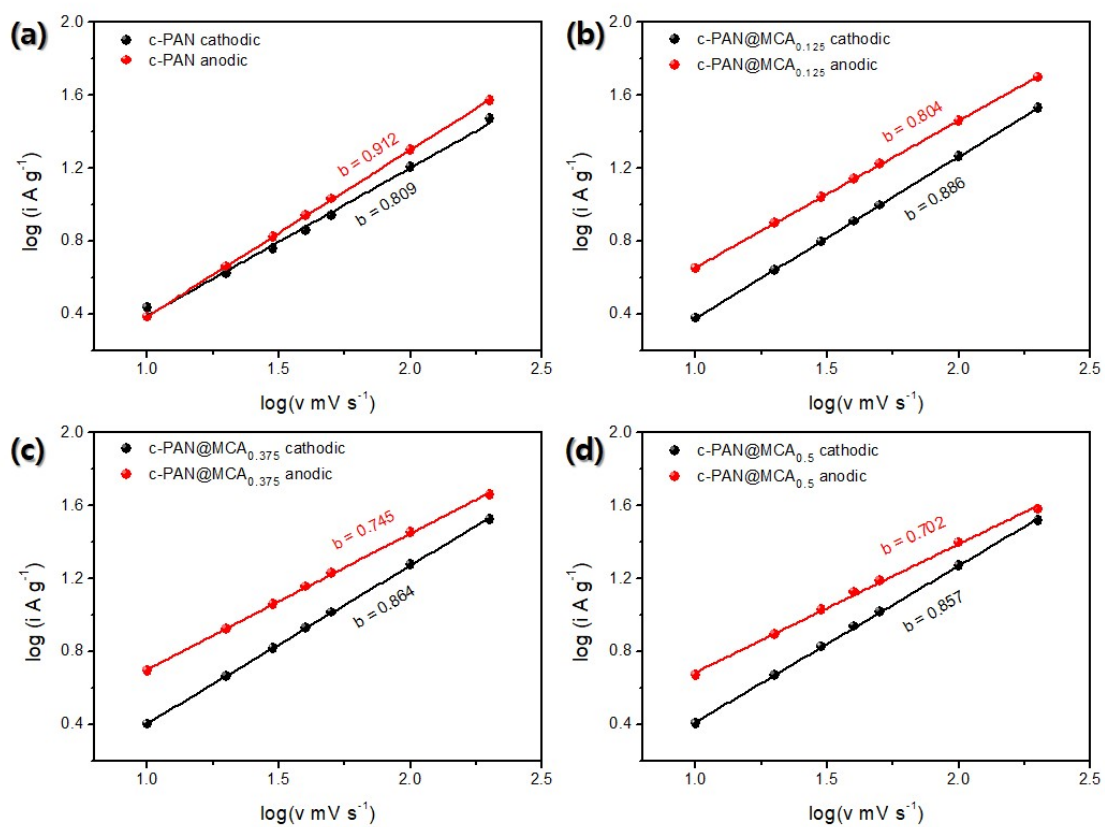

**Fig. S17.** Relationships between the peak current and scan rate for (a) c-PAN, (b) c-PAN@MCA<sub>0.125</sub>, (c) c-PAN@MCA<sub>0.375</sub>, and (d) c-PAN@MCA<sub>0.5</sub>.

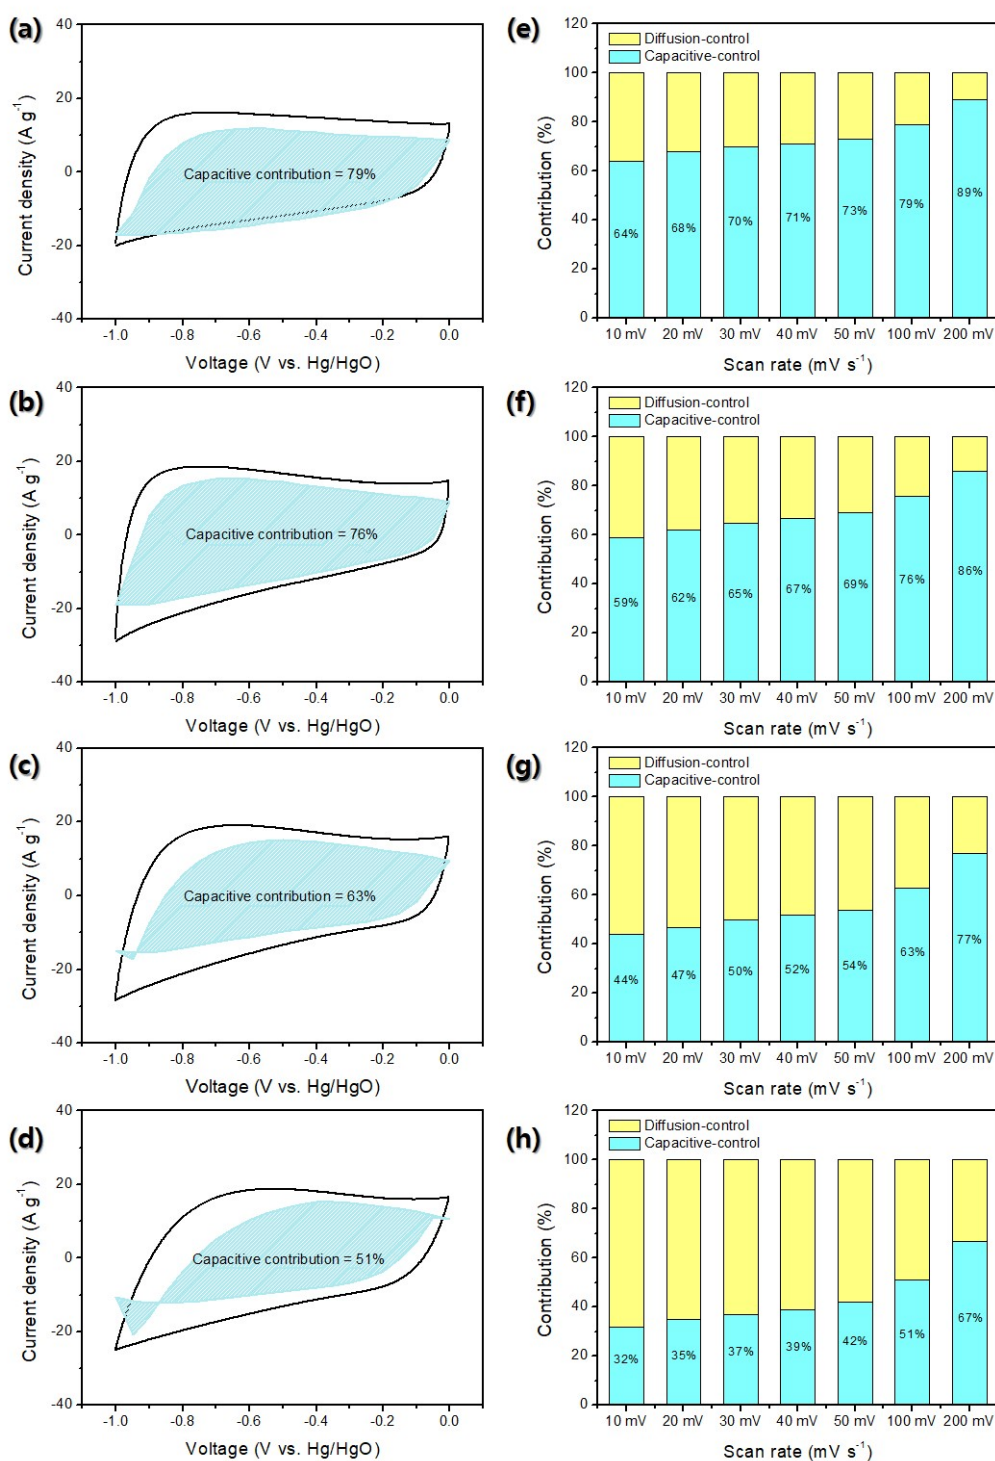

**Fig. S18.** Capacitive contributions at a scan rate of 100 mV s<sup>-1</sup> for (a) c-PAN, (b) c-PAN@MCA<sub>0.125</sub>, (c) c-PAN@MCA<sub>0.375</sub>, and (d) c-PAN@MCA<sub>0.5</sub>. (f) Capacitive contributions at various scan rates for (e) c-PAN, (f) c-PAN@MCA<sub>0.125</sub>, (g) c-PAN@MCA<sub>0.375</sub>, and (h) c-PAN@MCA<sub>0.5</sub>.

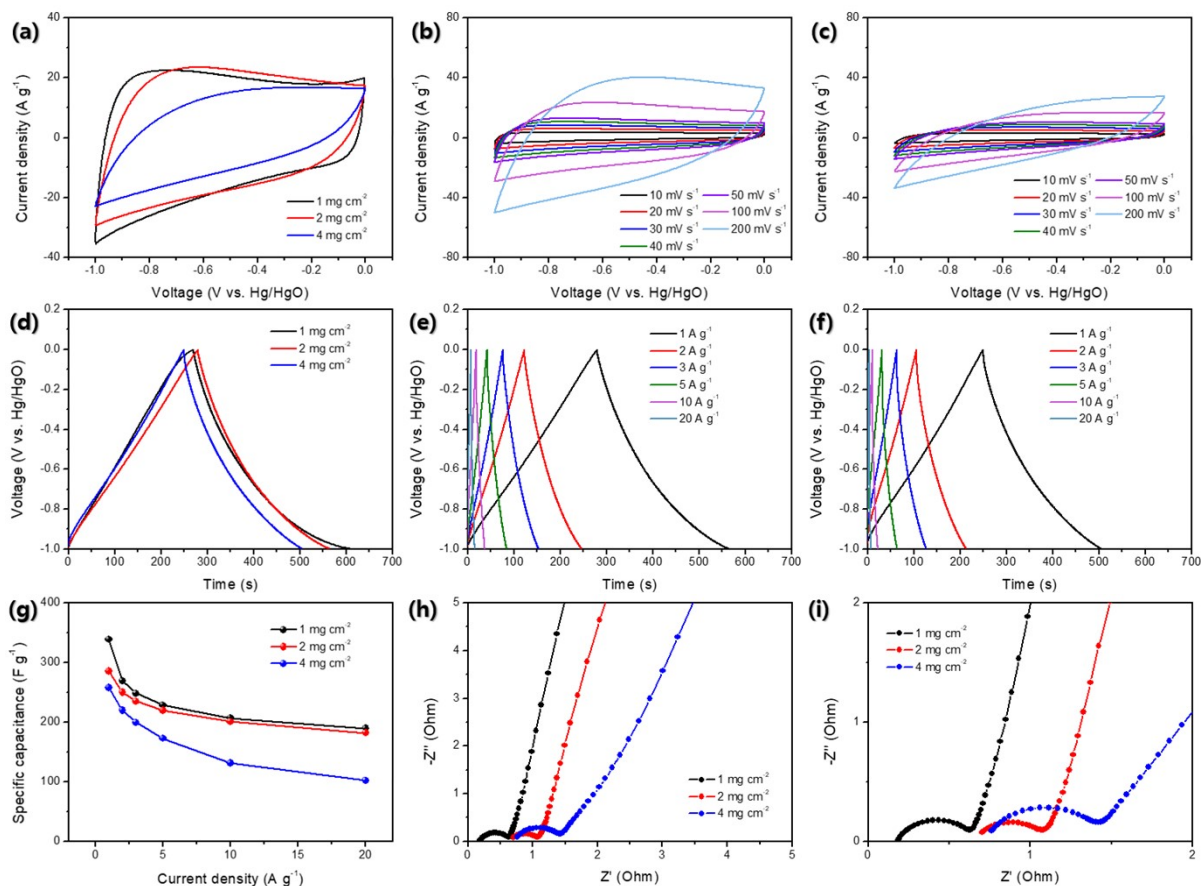

**Fig. S19.** Electrochemical performances of c-PAN@MCA<sub>0.25</sub> with different mass loadings measured in a three-electrode configuration in 6 M aqueous KOH electrolyte. (a) CV curves of c-PAN@MCA<sub>0.25</sub> with different mass loadings at a scan rate of 100 mV s<sup>-1</sup>. CV curves of c-PAN@MCA<sub>0.25</sub> with mass loadings of (b) 2 mg cm<sup>-2</sup> and (c) 4 mg cm<sup>-2</sup> at various scan rates. (d) GCD curves of c-PAN@MCA<sub>0.25</sub> with different mass loadings at a current density of 1 A g<sup>-1</sup>. GCD curves of c-PAN@MCA<sub>0.25</sub> with mass loadings of (e) 2 mg cm<sup>-2</sup> and (f) 4 mg cm<sup>-2</sup> at various current densities. (g) Specific capacitances at various current densities for c-PAN@MCA<sub>0.25</sub> with different mass loadings. (h, i) Nyquist plots of c-PAN@MCA<sub>0.25</sub> with different mass loadings.

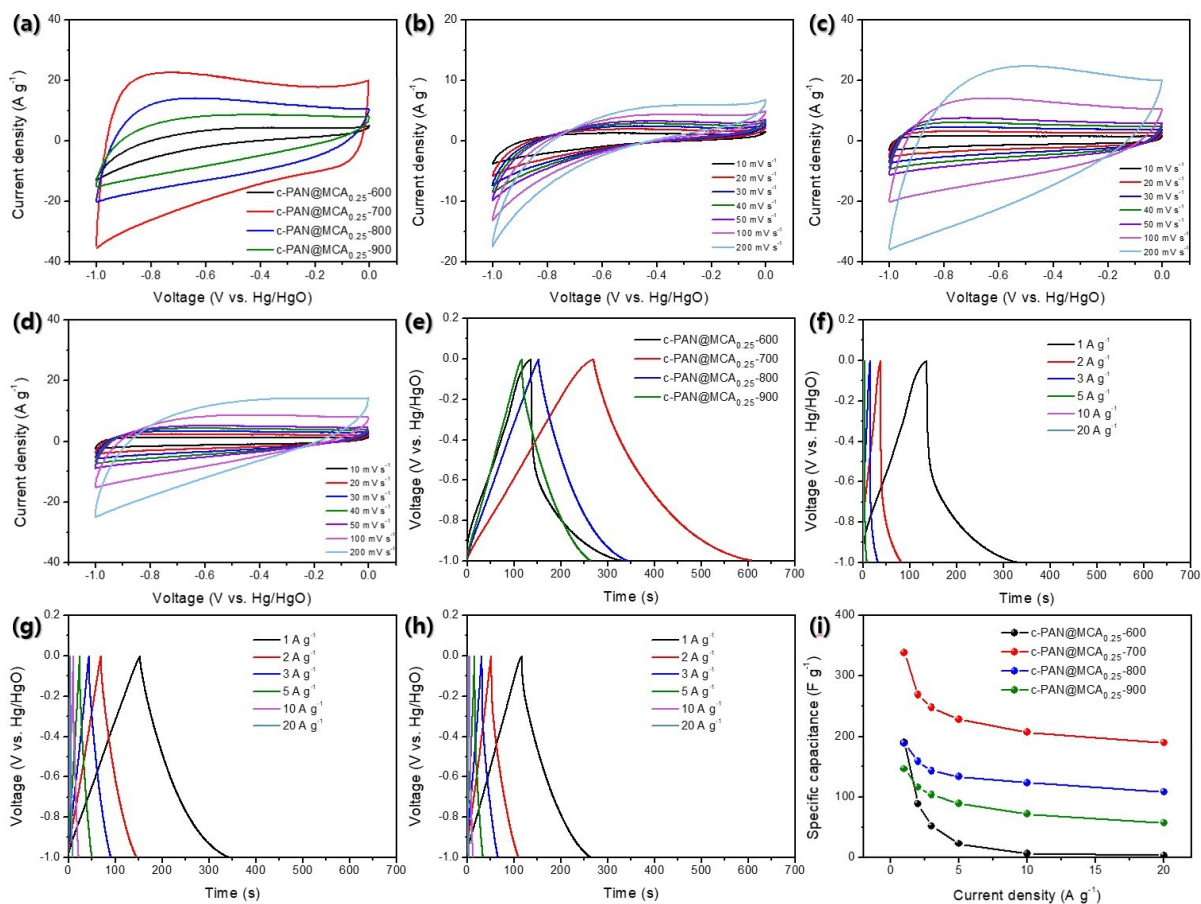

**Fig. S20.** Electrochemical performances of c-PAN@MCA<sub>0.25</sub> with different annealing temperatures measured in a three-electrode configuration in 6 M aqueous KOH electrolyte. (a) CV curves of c-PAN@MCA<sub>0.25</sub> with different annealing temperatures at a scan rate of 100 mV s<sup>-1</sup>. CV curves of c-PAN@MCA<sub>0.25</sub> with annealing temperatures of (b) 600, (c) 800, and (d) 900 °C at various scan rates. (e) GCD curves of c-PAN@MCA<sub>0.25</sub> with different annealing temperatures at a current density of 1 A g<sup>-1</sup>. GCD curves of c-PAN@MCA<sub>0.25</sub> with mass loadings of (f) 600, (g) 800, and (h) 900 °C at various current densities. (i) Specific capacitances at various current densities for c-PAN@MCA<sub>0.25</sub> with different annealing temperatures.

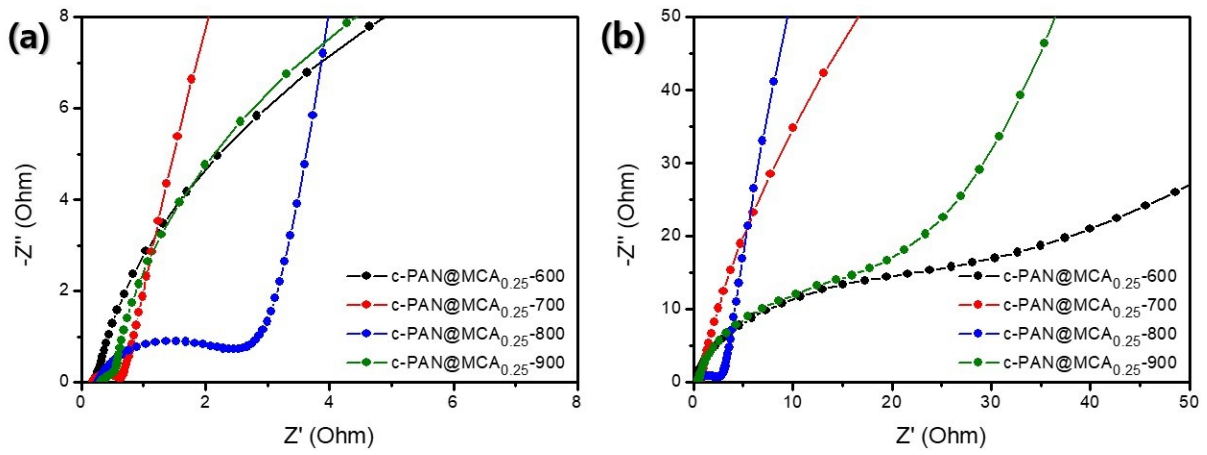

Fig. S21. (a, b) Nyquist plots of c-PAN@MCA<sub>0.25</sub> with different annealing temperatures.

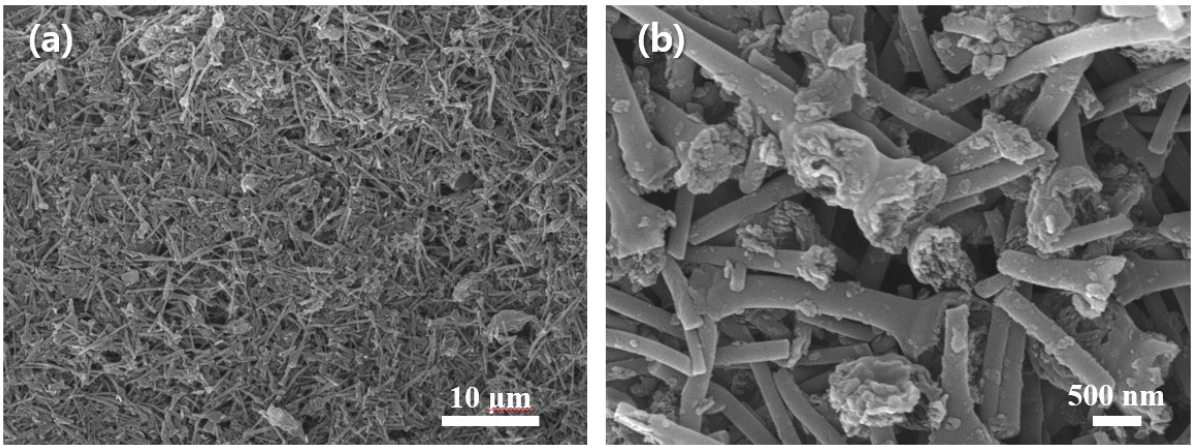

**Fig. S22.** (c, b) SEM images of ground c-PAN@MCA<sub>0.25</sub> nanofiber.

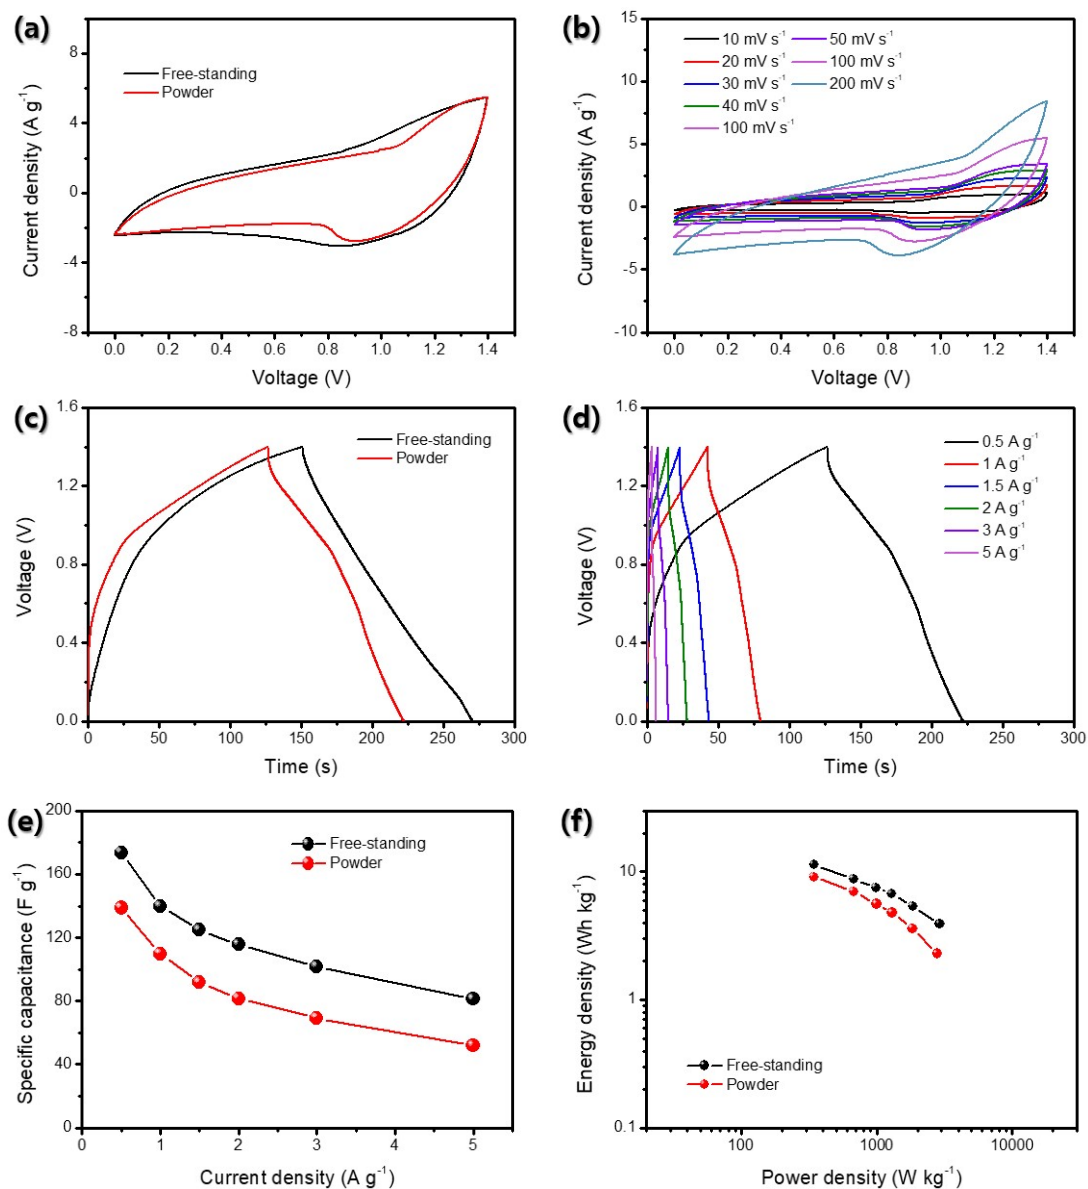

**Fig. S23.** Electrochemical performance measured in a two-electrode configuration in 1 M aqueous  $\text{Na}_2\text{SO}_4$  electrolyte. (a) CV curves for free-standing and ground c-PAN@MCA<sub>0.25</sub>-based symmetric SC at a scan rate of  $100 \text{ mV s}^{-1}$ , respectively. (b) CV curves of ground c-PAN@MCA<sub>0.25</sub>-based symmetric SC at various scan rates. (c) GCD curves for free-standing and ground c-PAN@MCA<sub>0.25</sub>-based symmetric SC at a current density of  $1 \text{ A g}^{-1}$ , respectively. (d) GCD curves of ground c-PAN@MCA<sub>0.25</sub>-based symmetric SC at various current densities. (e) Specific capacitances of free-standing and ground c-PAN@MCA<sub>0.25</sub>-based symmetric SC at various current densities, respectively. (f) Ragone plot for free-standing and ground c-PAN@MCA<sub>0.25</sub>-based symmetric SCs, respectively.

To measure the electrochemical performance of powder-type c-PAN@MCA<sub>0.25</sub>, ground c-PAN@MCA<sub>0.25</sub> was mixed uniformly with carbon black, and poly(vinylidene fluoride) with a mass ratio of 8:1:1 and then pasted onto the nickel foam ( $1 \times 2 \text{ cm}^2$ ). The active mass in each electrode was fixed at  $1 \text{ mg cm}^{-2}$ .



**Table S1.** BET surface area ( $S_{\text{BET}}$ ), total pore volume ( $V_{\text{total}}$ ), micropore volume ( $V_{\text{micro}}$ ) and mesopore volume ( $V_{\text{meso}}$ ) of c-PAN and c-PAN@MCA nanofibers.

|                            | $S_{\text{BET}}$ ( $\text{m}^2 \text{g}^{-1}$ ) | $V_{\text{total}}$ ( $\text{cm}^3 \text{g}^{-1}$ ) | $V_{\text{micro}}$ ( $\text{cm}^3 \text{g}^{-1}$ ) | $V_{\text{meso}}$ ( $\text{cm}^3 \text{g}^{-1}$ ) |
|----------------------------|-------------------------------------------------|----------------------------------------------------|----------------------------------------------------|---------------------------------------------------|
| c-PAN                      | 7.1                                             | 0.027                                              | 0.026                                              | 0.001                                             |
| c-PAN@MCA <sub>0.125</sub> | 335.1                                           | 0.211                                              | 0.084                                              | 0.127                                             |
| c-PAN@MCA <sub>0.25</sub>  | 403.1                                           | 0.358                                              | 0.212                                              | 0.146                                             |
| c-PAN@MCA <sub>0.375</sub> | 368.5                                           | 0.321                                              | 0.187                                              | 0.134                                             |
| c-PAN@MCA <sub>0.5</sub>   | 347.6                                           | 0.463                                              | 0.346                                              | 0.117                                             |

**Table S2.** Atomic concentrations for c-PAN and c-PAN@MCA nanofibers.

|                            | C (at%) | N (at%) | O (at%) |
|----------------------------|---------|---------|---------|
| c-PAN                      | 87.8    | 8.8     | 3.4     |
| c-PAN@MCA <sub>0.125</sub> | 83.4    | 11.9    | 4.7     |
| c-PAN@MCA <sub>0.25</sub>  | 82.1    | 13.5    | 4.4     |
| c-PAN@MCA <sub>0.375</sub> | 81.3    | 14.7    | 4.0     |
| c-PAN@MCA <sub>0.5</sub>   | 80.6    | 15.4    | 4.0     |

**Table S3.** Summary of the electrochemical performance of c-PAN@MCA<sub>0.25</sub> and the state-of-the-art carbon nanofiber electrodes.

| Electrode sample name     | Specific capacitance (three-electrode configuration)                       | Energy density            | Power density           | Mass loading                      | Reference |
|---------------------------|----------------------------------------------------------------------------|---------------------------|-------------------------|-----------------------------------|-----------|
|                           | 338.6 F g <sup>-1</sup> (1 A g <sup>-1</sup> )                             | 11.4 Wh kg <sup>-1</sup>  | 344 W kg <sup>-1</sup>  | 1 mg cm <sup>-2</sup>             |           |
| c-PAN@MCA <sub>0.25</sub> | 285.7 F g <sup>-1</sup> (1 A g <sup>-1</sup> )                             | N/A                       | N/A                     | 2 mg cm <sup>-2</sup>             | This work |
|                           | 257.8 F g <sup>-1</sup> (1 A g <sup>-1</sup> )                             | N/A                       | N/A                     | 4 mg cm <sup>-2</sup>             |           |
| CLCF                      | 223.8 F g <sup>-1</sup> (0.5 A g <sup>-1</sup> )                           | 5.9 Wh kg <sup>-1</sup>   | 1200 W kg <sup>-1</sup> | 1.2 mg cm <sup>-2</sup>           | 1         |
| MCF                       | 105 F g <sup>-1</sup> (5 mV s <sup>-1</sup> , two-electrode configuration) | 5.1 Wh kg <sup>-1</sup>   | 242 W kg <sup>-1</sup>  | 0.44 mg cm <sup>-2</sup>          | 2         |
| P-CNF                     | 104 F g <sup>-1</sup> (0.2 A g <sup>-1</sup> )                             | 3.22 Wh kg <sup>-1</sup>  | 600 W kg <sup>-1</sup>  | 0.51 mg cm <sup>-2</sup>          | 3         |
| PHCNF30                   | 239 F g <sup>-1</sup> (1 A g <sup>-1</sup> )                               | 5.28 Wh kg <sup>-1</sup>  | 500 W kg <sup>-1</sup>  | 2 mg cm <sup>-2</sup>             | 4         |
| C67 <sub>14</sub> @PAN-OC | 270 F g <sup>-1</sup> (1 A g <sup>-1</sup> )                               | 9.64 Wh kg <sup>-1</sup>  | 550 W kg <sup>-1</sup>  | N/A                               | 5         |
| NHCF                      | 302 F g <sup>-1</sup> (0.5 A g <sup>-1</sup> )                             | N/A                       | N/A                     | 1 mg cm <sup>-2</sup>             | 6         |
| UT-CNF                    | 243 F g <sup>-1</sup> (1 A g <sup>-1</sup> )                               | N/A                       | N/A                     | 1.2-1.4 mg cm <sup>-2</sup>       | 7         |
| CACNF                     | 202 F g <sup>-1</sup> (0.1 A g <sup>-1</sup> )                             | N/A                       | N/A                     | 1.5 mg cm <sup>-2</sup>           | 8         |
| NFMCNF                    | 252.6 F g <sup>-1</sup> (0.5 A g <sup>-1</sup> )                           | 8.07 Wh kg <sup>-1</sup>  | 248 W kg <sup>-1</sup>  | N/A                               | 9         |
| N-CNT@CF                  | 367 F g <sup>-1</sup> (0.5 A g <sup>-1</sup> )                             | 5.5 Wh kg <sup>-1</sup>   | 254 W kg <sup>-1</sup>  | 1.0-1.2 mg cm <sup>-2</sup>       | 10        |
| NC-800                    | 264 F g <sup>-1</sup> (1 A g <sup>-1</sup> )                               | N/A                       | N/A                     | 1.5 mg cm <sup>-2</sup>           | 11        |
| N-PCNFA                   | 279 F g <sup>-1</sup> (0.5 A g <sup>-1</sup> )                             | N/A                       | N/A                     | N/A                               | 12        |
| PAN/NOC (7:3)             | 394 F g <sup>-1</sup> (1 A g <sup>-1</sup> )                               | 13.6 Wh kg <sup>-1</sup>  | 500 W kg <sup>-1</sup>  | 1.67 mg cm <sup>-2</sup> (powder) | 13        |
| HPCNFs-N                  | 307.2 F g <sup>-1</sup> (1 A g <sup>-1</sup> )                             | 10.96 Wh kg <sup>-1</sup> | 250 W kg <sup>-1</sup>  | 1.0 mg cm <sup>-2</sup> (powder)  | 14        |
| NSCPCNF-800               | 396 F g <sup>-1</sup> (1 A g <sup>-1</sup> )                               | 14.3 Wh kg <sup>-1</sup>  | 250 W kg <sup>-1</sup>  | 1.0 mg cm <sup>-2</sup>           | 15        |

## References

1. Y. Cheng, L. Huang, X. Xiao, B. Yao, L. Yuan, T. Li, Z. Hu, B. Wang, J. Wan and J. Zhou, *Nano Energy*, 2015, **15**, 66-74.
2. Z. Liu, D. Fu, F. Liu, G. Han, C. Liu, Y. Chang, Y. Xiao, M. Li and S. Li, *Carbon*, 2014, **70**, 295-307.
3. Y. Liu, J. Zhou, L. Chen, P. Zhang, W. Fu, H. Zhao, Y. Ma, X. Pan, Z. Zhang, W. Han and E. Xie, *ACS Appl. Mater. Interfaces*, 2015, **7**, 23515-23520.
4. J.-G Kim, H.-C. Kim, N. D. Kim and M.-S Khil, *Compos. B Eng.*, 2020, **186**, 107825.
5. C.-H Yang, Y.-C. Hsiao and L.-Y Lin, *ACS Appl. Mater. Interfaces*, 2021, **13**, 41637-41648.
6. Y. Yao, H. Wu, L. Huang, X. Li, L. Yu, S. Zeng, X. Zeng, J. Yang and J. Zou, *Electrochim. Acta*, 2017, **246**, 606-614.
7. W. M. Chang, C. C. Wang and C. Y. Chen, *Electrochim. Acta*, 2019, **296**, 268-275.
8. Q. Fan, C. Ma, L. Wu, C. Wei, H. Wang, Y. Song and J. Shi, *RSC Adv.*, 2019, **9**, 6419-6428.
9. W. Na, J. Jun, J. W. Park, G. Lee and J. Jang, *J. Mater. Chem. A*, 2017, **5**, 17379-17387.
10. T. P. Mofokeng, Z. N. Tetana and K. I. Ozoemena, *Carbon*, 2020, **169**, 312-326.
11. Q. Jiang, M. Liu, C. Shao, X. Li, H. Liu, X. Li and Y. Liu, *Electrochim. Acta*, 2020, **330**, 135212.
12. Y. Yang, Y.-x. Liu, Y. Li, B.-w. Deng, B. Yin and M.-b Yang, *J. Mater. Chem. A*, 2020, **8**, 17257.
13. H. Wang, H. Niu, H. Wang, W. Wang, X. Jin, H. Wang, H. Zhou and T. Lin, *J. Power Sources*, 2021, **482**, 228986.
14. L-F Chen, Y. Lu, L. Yu and X. W. Lou, *Energy Environ. Sci.*, 2017, **10**, 1777-1783.
15. Y. Li, G. Zhu, H. Huang, M. Xu, T. Lu and L. Pan, *J. Mater. Chem. A*, 2019, **7**, 9040-9050

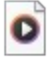

Supplementary  
movie 1\_c-PAN@N

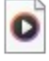

Supplementary  
movie 2\_c-PAN@N
